# Supplementary material
Source: PubMed Central journal article supplement (PMC6142263)
Supplement: pnas.1800285115.sapp.pdf [file pnas.1800285115.sapp.pdf]

## Supporting Information

Schiebelhut et al.

**Table S1** List of sites and sample sizes used in genetic analyses. Pre-SSWD adults were collected from Aug 2012 – May 2013, post-SSWD adults were collected in Jan 2014 (site K) and Dec 2014 – May 2015, and <1-year-old recruits were collect from Dec 2013 – May 2014.

| Site Code     | Site             | County    | Latitude | Longitude | Pre-SSWD Adults | Post-SSWD Adults | <1-yr Recruits |
|---------------|------------------|-----------|----------|-----------|-----------------|------------------|----------------|
| A             | Arena Cove       | Mendocino | 38.918   | -123.721  | 9               | 10               | *              |
| B             | Moat Creek       | Mendocino | 38.880   | -123.675  | 10              | 1                | *              |
| C             | Iversen Point    | Mendocino | 38.848   | -123.647  | 10              | 2                | *              |
| D             | Serenisea        | Mendocino | 38.798   | -123.573  | 10              | 10               | *              |
| E             | Del Mar          | Sonoma    | 38.741   | -123.508  | 9               | 4                | 3              |
| F             | Sculpture Point  | Sonoma    | 38.700   | -123.443  | 10              | 10               | *              |
| G             | Fisk Mill Cove   | Sonoma    | 38.597   | -123.351  | 4               | 10               | 5              |
| H             | Phillips Gulch   | Sonoma    | 38.587   | -123.342  | 10              | 10               | *              |
| I             | Windermere Point | Sonoma    | 38.525   | -123.268  | 10              | 9                | *              |
| J             | Twin Coves       | Sonoma    | 38.459   | -123.146  | 10              | 10               | *              |
| K             | Bodega Reserve   | Sonoma    | 38.317   | -123.073  | 3               | 7                | 16             |
| L             | Bodega Head      | Sonoma    | 38.303   | -123.053  | 10              | 9                | *              |
| M             | McClures Beach   | Marin     | 38.182   | -122.966  | 10              | 10               | 50             |
| N             | Lifeboat House   | Marin     | 37.997   | -122.979  | 10              | 10               | 32             |
| O             | Palomarin        | Marin     | 37.931   | -122.750  | 10              | 10               | *              |
| P             | Duxbury Reef     | Marin     | 37.893   | -122.707  | 7               | 4                | *              |
| <b>Totals</b> |                  |           |          |           | 142             | 126              | 106            |

\* Site surveyed but no specimens found to collect for genetic analysis.

**Table S2** Ecological survey data—*P. ochraceus* densities (per m<sup>2</sup>) by geographic location (additional details in Table S1) and date.

| Site | Pre-SSWD                     |          |        | Post-SSWD   |          |                |        |
|------|------------------------------|----------|--------|-------------|----------|----------------|--------|
|      | Date                         | Recruits | Adults | Date        | Recruits | Date           | Adults |
| A    | 18/Oct/2012                  | 0        | *      | 02/Dec/2013 | 0        | 17&18/May/2015 | †      |
| B    | 17/Oct/2012 &<br>09/Dec/2012 | 0        | 0.012  | 30/Dec/2013 | 0        | 05/Dec/2014    | 0      |
| C    | 16/Dec/2012                  | 0        | 0.012  | 02/Jan/2014 | 0        | 22/Dec/2014    | 0      |
| D    | 15/Dec/2012                  | 0        | 0.036  | 28/Jan/2014 | 0        | 19/May/2015    | 0.021  |
| E    | 15/Nov/2012                  | 0        | 0.059  | 01/Dec/2013 | 0.127    | 04/Dec/2014    | 0.004  |
| F    | 17/Nov/2012                  | 0        | 0.023  | 29/Jan/2014 | 0        | 06/Dec/2014    | 0.004  |
| G    | 16/Nov/2012                  | 0        | 0.034  | 03/Jan/2014 | 0.171    | 19/Apr/2015    | 0.030  |
| H    | 14/Dec/2012                  | 0        | 0.039  | 30/Jan/2014 | 0        | 19/Jan/2015    | 0.019  |
| I    | 12/Nov/2012                  | 0        | 0.003  | 05/Dec/2013 | 0        | 18/Jan/2015    | 0.003  |
| J    | 13/Dec/2012                  | 0        | 0.017  | 31/Jan/2014 | 0        | 20&23/Dec/2014 | 0.006  |
| K    | 16/Oct/2012                  | 0        | *      | 04/Jan/2014 | 0.962    | 20/Apr/2015    | †      |
| L    | 12/Dec/2012                  | 0        | 0.017  | 04/Dec/2013 | 0        | 07/Dec/2014    | 0.005  |
| M    | 27/May/2013                  | 0.033    | 0.047  | 01/Feb/2014 | 3.784    | 20/May/2015    | 0.017  |
| N    | 10/Dec/2012                  | 0.069    | 0.270  | 15/May/2014 | 1.375    | 21/May/2015    | 0.060  |
| O    | 11/Dec/2012                  | 0        | 0.061  | 29/Dec/2013 | 0        | 21/Jan/2015    | 0.006  |
| P    | 14/Nov/2012                  | 0        | 0.010  | 03/Dec/2013 | 0        | 20/Jan/2015    | 0.001  |

\* No data collected.

† No paired data available so data not shown.

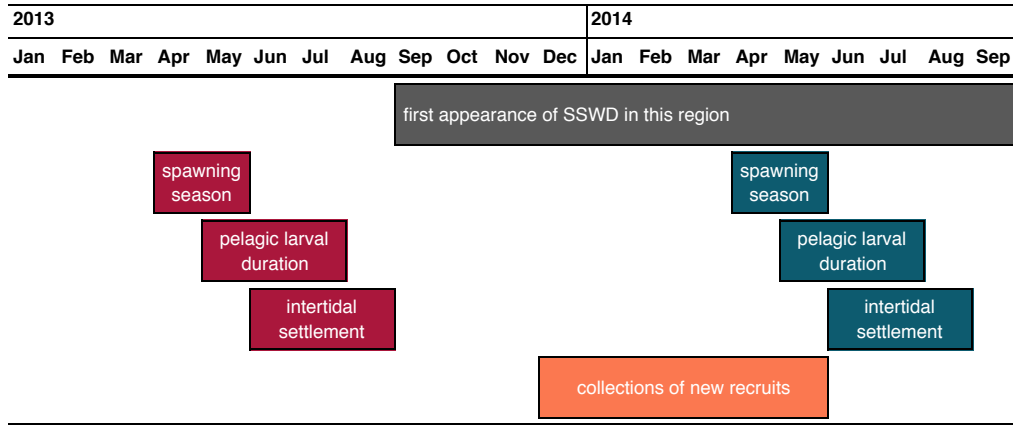

**Fig. S1 Timeline of main reproductive stages for the pre- and post- adults and onset of SSWD for *P. ochraceus*.** Spawning can occur from late March–May in Central California (26, 27)—slightly later to the north, e.g. May–early June in Oregon (29) and late spring on San Juan Island (28)—and have a pelagic duration of 6–8 weeks (30, 31), which would lead to intertidal settlement in approximately June–August. Recruits in this study would have been spawned by the pre-SSWD population of *P. ochraceus*.

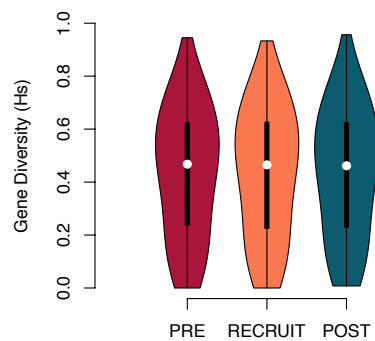

**Fig. S2 Overall gene diversity ( $H_s$ ) for pre-SSWD adults, post-SSWD adults, and recruits.** Violin plot using all loci.

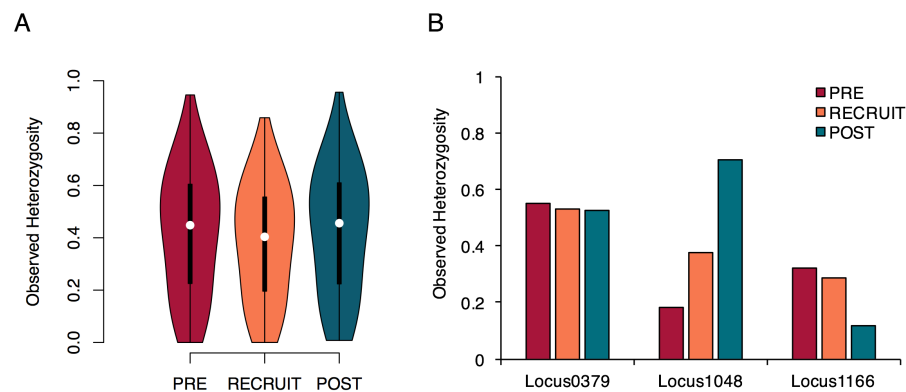

**Fig. S3 Observed heterozygosity in pre- and post-SSWD adult *P. ochraceus* and recruits for (A) a violin plot of all 1,225 loci and (B) bar graph for outlier loci (identified by BayeScan).**

### Locus0379

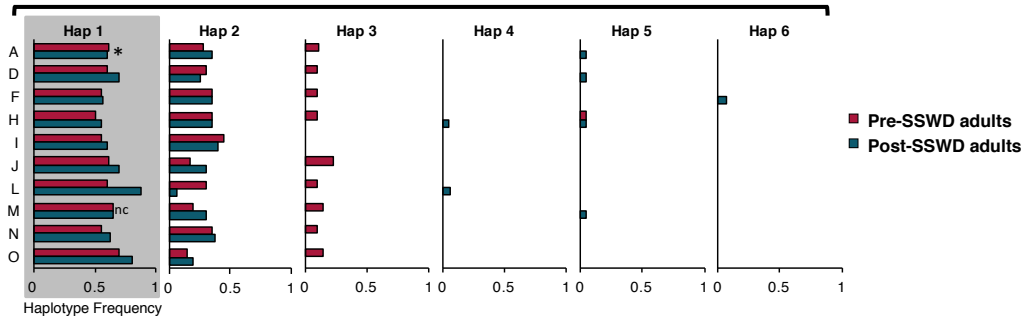

### Locus1048

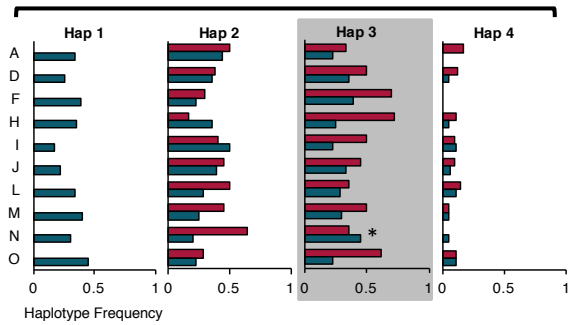

### Locus1166

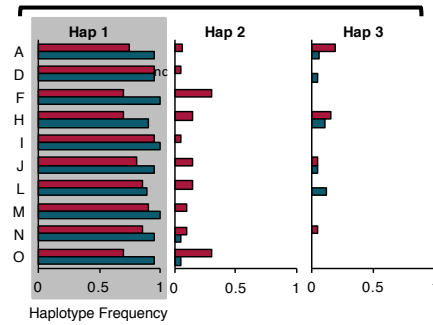

**Fig. S4 Consistent change in allele frequency from pre- to post-SSWD adults across geographic locations** for all haplotypes in the putatively selected outlier loci identified in BayeScan (FDR = 0.10). Gray shading indicates most common haplotype (Fig. 4) for each locus. For most common haplotype \* indicated direction of allele frequency change differs from other geographic locations. Only sites with *P. ochraceus* samples of  $n \geq 9$  for both pre- and post-SSWD included (Table S1, Fig. 1).

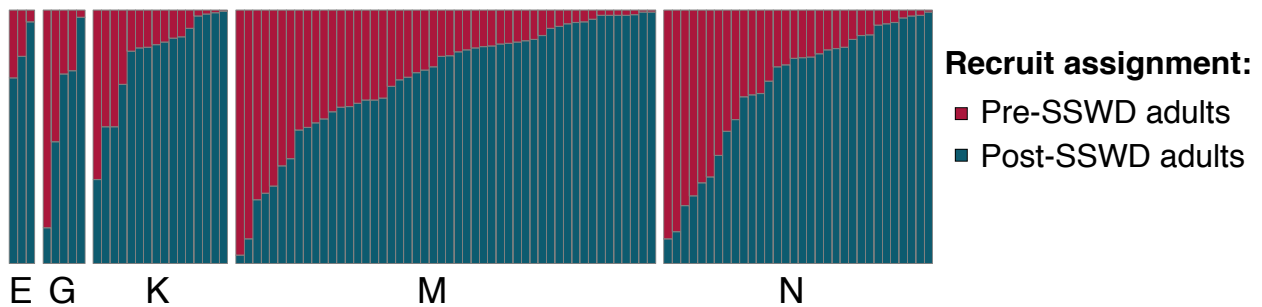

**Fig. S5 Assignment of <1-yr *P. ochraceus* juveniles to pre- or post-SSWD adults.** Letters represent geographic sites from where juveniles were collected (Table S1, Fig. 1). Each column corresponds to a single juvenile, with the proportion of the column colored corresponding to the posterior probability of assignment of that individual to pre- or post-SSWD adults.

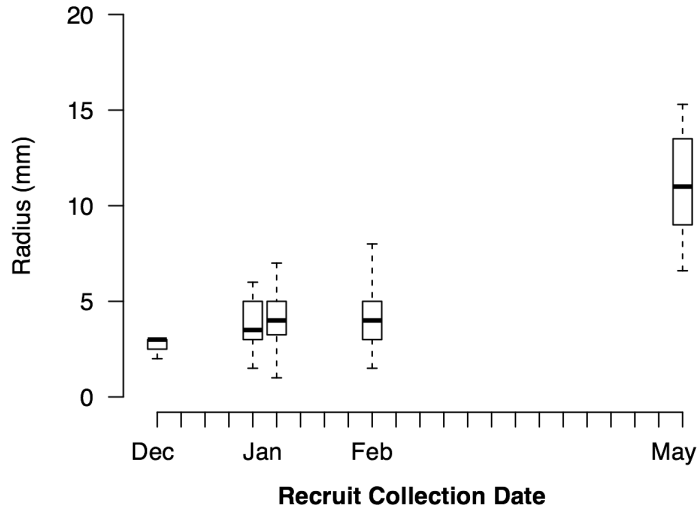

**Fig. S6 Recruit sizes by date.** See Table S2 for geographic location (E, G, K, M and N) and specific date and Table S1 for sample sizes. The distribution of sizes through time suggests a settlement period in summer–fall. The black bar represents the median, the box represents the interquartile range, and the whiskers represent the maximum or minimum value within  $Q1 - 1.5 \times IQR$  and  $Q3 + 1.5 \times IQR$ .

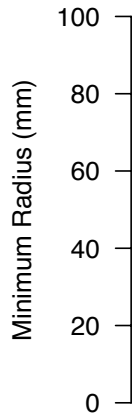

**Fig. S7 Minimum radius of *P. ochraceus* observed during the initial survey year (2012-13).** The black bar represents the median minimum radius across sites, the box represents the interquartile range, and the whiskers represent the maximum or minimum value within  $Q1 - 1.5 \times IQR$  and  $Q3 + 1.5 \times IQR$ . Outliers fall outside this range. Across all geographic sites except for two (sites M and N, Fig. 1) the minimum radius per site was greater than 40 mm.

#### Other Supporting Information Files

Dataset S1 (XLSX)

Dataset S2 (XLSX)
